# Supplementary material for: Direct-Acting Oral Anticoagulants: Practical Considerations for Emergency Medicine Physicians
Source: Hindawi journal article supplement (doi:10.1155/2016/1781684), 2016-01-01
Supplement: f1 [file 1781684.f1.pdf]

**Supplemental Table 1:** Summary of safety and efficacy of DOACs for the prevention of stroke and SEE in patients with NVAF [19-22]

|                                   | Primary efficacy endpoint <sup>a</sup> |                                                      | Primary safety outcome <sup>b</sup> |                            |
|-----------------------------------|----------------------------------------|------------------------------------------------------|-------------------------------------|----------------------------|
|                                   | N, n (%)                               | HR (95% CI)<br>P value                               | N, n (%)                            | HR (95% CI)<br>P value     |
| <b>RE-LY</b>                      |                                        |                                                      |                                     |                            |
| Dabigatran 110 mg BID             | 6015, 182<br>(1.53)                    | 0.91 (0.74–1.11)<br>0.34                             | 6015, 322<br>(2.71)                 | 0.80 (0.69–0.93)<br>0.003  |
| Dabigatran 150 mg BID             | 6076, 134<br>(1.11)                    | 0.66 (0.53–0.82)<br><0.001                           | 6076, 375<br>(3.11)                 | 0.93 (0.81–1.07)<br>0.31   |
| Warfarin                          | 6022, 199<br>(1.69)                    |                                                      | 6022, 397<br>(3.36)                 |                            |
| <b>ROCKET AF</b>                  |                                        |                                                      |                                     |                            |
| Rivaroxaban 20 mg QD <sup>c</sup> | 7081, 269<br>(2.10)                    | 0.88 (0.75–1.03)<br>0.12                             | 7111,<br>1475<br>(20.70)            | 1.03 (0.96–1.11)<br>0.44   |
| Warfarin                          | 7090, 306<br>(2.40)                    |                                                      | 7125,<br>1449<br>(20.30)            |                            |
| <b>ARISTOTLE</b>                  |                                        |                                                      |                                     |                            |
| Apixaban 5 mg BID <sup>d</sup>    | 9120, 212<br>(1.27)                    | 0.79 (0.66–0.95)<br>0.01                             | 9088, 327<br>(2.13)                 | 0.69 (0.60–0.80)<br><0.001 |
| Warfarin                          | 9081, 265<br>(1.60)                    |                                                      | 9052, 462<br>(3.09)                 |                            |
| <b>ENGAGE AF-TIMI 48</b>          |                                        |                                                      |                                     |                            |
| Edoxaban 60 mg QD                 | 7035, 182<br>(1.18)                    | 0.79 (0.63–0.99) <sup>e</sup><br><0.001 <sup>f</sup> | 7012, 418<br>(2.75)                 | 0.80 (0.71–0.91)<br><0.001 |
| Edoxaban 30 mg QD                 | 7034, 253<br>(1.61)                    | 1.07 (0.87–1.31) <sup>e</sup><br>0.005 <sup>f</sup>  | 7002, 254<br>(1.61)                 | 0.47 (0.41–0.55)<br><0.001 |
| Warfarin                          | 7036, 232<br>(1.50)                    |                                                      | 7012, 524<br>(3.43)                 |                            |

<sup>a</sup>For RE-LY, ROCKET AF, ARISTOTLE, and ENGAGE AF-TIMI 48, the primary efficacy endpoint was stroke or SEE.

<sup>b</sup>For RE-LY, ARISTOTLE, and ENGAGE AF-TIMI 48, the primary safety endpoint was major bleeding; for ROCKET AF, the primary safety endpoint was major or clinically relevant nonmajor bleeding.

<sup>c</sup>15 mg QD in patients with creatinine clearance 30–49 mL/min.

<sup>d</sup>2.5 mg BID in patients meeting 2 or more of the following criteria: age ≥80 years, body weight ≤60 kg, or serum creatinine ≥15 mg/L.

<sup>e</sup>97.5% CI.

<sup>f</sup>P value for noninferiority.

ARISTOTLE, Apixaban for Reduction in Stroke and Other Thromboembolic Events in Atrial Fibrillation; BID, twice daily; DOACs, direct-acting oral anticoagulants; ENGAGE AF-TIMI 48, Effective Anticoagulation with Factor Xa Next Generation in Atrial Fibrillation–Thrombolysis in Myocardial Infarction 48; HR, hazard ratio; N, number of total patients; n, number of events;

NVAF, nonvalvular atrial fibrillation; QD, once daily; RE-LY, Randomized Evaluation of Long-Term Anticoagulation Therapy; ROCKET AF, Rivaroxaban Once Daily Oral Direct Factor Xa Inhibition Compared with Vitamin K Antagonism for Prevention of Stroke and Embolism Trial in Atrial Fibrillation; SEE, systemic embolic event; VKA, vitamin K antagonist.

**Supplemental Table 2:** Summary of safety and efficacy of DOACs for the treatment and secondary prevention of VTE [28-32]

|                                    | Primary efficacy endpoint <sup>a</sup> |                                     | Primary safety outcome <sup>b</sup> |                            |
|------------------------------------|----------------------------------------|-------------------------------------|-------------------------------------|----------------------------|
|                                    | N, n (%)                               | HR (95% CI)<br>P value <sup>c</sup> | N, n (%)                            | HR (95% CI)<br>P value     |
| <b>RE-COVER I/II</b>               |                                        |                                     |                                     |                            |
| Dabigatran 150 mg BID <sup>d</sup> | 2553, 60<br>(2.4)                      | 1.09 (0.76–1.57)<br>NR              | 2553, 37<br>(1.4)                   | 0.73 (0.48–1.11)<br>NR     |
| Heparin/VKA                        | 2554, 55<br>(2.2)                      |                                     | 2554, 51<br>(2.0)                   |                            |
| <b>EINSTEIN-DVT</b>                |                                        |                                     |                                     |                            |
| Rivaroxaban <sup>e</sup>           | 1731, 36<br>(2.1)                      | 0.68 (0.44–1.04)<br><0.001          | 1718, 139<br>(8.1)                  | 0.97 (0.76–1.22)<br>0.77   |
| Heparin/VKA                        | 1718<br>51 (3.0)                       |                                     | 1711<br>138 (8.1)                   |                            |
| <b>EINSTEIN-PE</b>                 |                                        |                                     |                                     |                            |
| Rivaroxaban <sup>e</sup>           | 2419, 50<br>(2.1)                      | 1.12 (0.75–1.68)<br>0.003           | 2412, 249<br>(10.3)                 | 0.90 (0.76–1.07)<br>0.23   |
| Heparin/VKA                        | 2413<br>44 (1.8)                       |                                     | 2405<br>274 (11.4)                  |                            |
| <b>AMPLIFY</b>                     |                                        |                                     |                                     |                            |
| Apixaban <sup>f</sup>              | 2609, 59<br>(2.3)                      | 0.84 (0.60–1.18)<br><0.001          | 2676, 15<br>(0.6)                   | 0.31 (0.17–0.55)<br><0.001 |
| Heparin/VKA                        | 2635<br>71 (2.7)                       |                                     | 2689, 49<br>(1.8)                   |                            |
| <b>Hokusai-VTE</b>                 |                                        |                                     |                                     |                            |
| Edoxaban 60 mg QD <sup>d,g</sup>   | 4118, 130<br>(3.2)                     | 0.89 (0.70–1.13)<br><0.001          | 4118, 349<br>(8.5)                  | 0.81 (0.71–0.94)<br>0.004  |
| Heparin/VKA                        | 4122, 146<br>(3.5)                     |                                     | 4122, 423<br>(10.3)                 |                            |

<sup>a</sup>For Hokusai-VTE, AMPLIFY, and RE-COVER I/II, the primary efficacy endpoint was first recurrent VTE or VTE-related death; for EINSTEIN-DVT and EINSTEIN-PE, the primary efficacy endpoint was recurrent VTE.

<sup>b</sup>For Hokusai-VTE, EINSTEIN-PE, and EINSTEIN-DVT, the primary safety endpoint was major or clinically relevant nonmajor bleeding; for AMPLIFY and RECOVERI/II, the primary safety endpoint was major bleeding.

<sup>c</sup>P value for noninferiority.

<sup>d</sup>With a parenteral anticoagulation lead-in.

<sup>e</sup>15 mg BID for 3 weeks followed by 20 mg QD.

<sup>f</sup>10 mg BID for the first 7 days followed by 5 mg BID for 6 months.

<sup>g</sup>30 mg QD in patients with creatinine clearance 30–50 mL/min or body weight ≤60 kg, or receiving concomitant potent P-glycoprotein inhibitors.

AMPLIFY, Apixaban for the Initial Management of Pulmonary Embolism and Deep-Vein Thrombosis as First-Line Therapy; BID, twice daily; CI, confidence interval; DOACs, direct-

acting oral anticoagulants; DVT, deep vein thrombosis; HR, hazard ratio; N, number of total patients; n, number of events; NR, not reported; PE, pulmonary embolism; QD, once daily; VKA, vitamin K antagonist; VTE, venous thromboembolism.
